1 **Curating clinically relevant transcripts for the interpretation of sequence variants**

2 Marina T. DiStefano<sup>1</sup>, Sarah E. Hemphill<sup>1</sup>, Brandon J. Cushman<sup>1</sup>, Mark J. Bowser<sup>1</sup>, Elizabeth Hynes<sup>1</sup>,  
3 Andrew R. Grant<sup>1</sup>, Rebecca K. Siegert<sup>1</sup>, Andrea M. Oza<sup>1</sup>, Michael A. Gonzalez<sup>2</sup>, Sami S. Amr<sup>1,3</sup>, Heidi L.  
4 Rehm<sup>1,4,5</sup>, and Ahmad N. Abou Tayoun<sup>2</sup>

5

6 <sup>1</sup>Laboratory for Molecular Medicine, Partners Healthcare Personalized Medicine, Cambridge,  
7 MA, USA.

8 <sup>2</sup>Division of Genomic Diagnostics, The Children's Hospital of Philadelphia, The University of  
9 Pennsylvania Perelman School of Medicine, Philadelphia, PA, USA.

10 <sup>3</sup>Department of Pathology, Brigham & Women's Hospital, Harvard Medical School, Boston,  
11 MA USA

12 <sup>4</sup>Center for Genomic Medicine, Massachusetts General Hospital, Harvard Medical School,  
13 Boston MA USA

14 <sup>5</sup>The Broad Institute of MIT and Harvard, Cambridge, MA, USA

15

16 **Disclosures:** None of the authors have a direct financial or personal interest in the subject matter  
17 or materials discussed in the article

18

19 **Number of text pages, tables and figures:** 14 text pages (excluding references and figure  
20 legends), 1 table, 5 figures, 4 supplementary tables

21

22 **Running head (40 characters or less):** Transcript Curation for Sequence Variants Interpretation

23

24 **Grant numbers and sources of support (including departmental or institutional funding**  
25 **when no extramural funding was received);** Research reported in this publication was  
26 supported by the National Human Genome Research Institute (NHGRI), in conjunction with  
27 additional funding from the Eunice Kennedy Shriver National Institute of Child Health and  
28 Human Development (NICHD) under award number: U41HG006834. The content is solely the  
29 responsibility of the authors and does not necessarily represent the official views of the National  
30 Institutes of Health.

31

32 **Corresponding author:** Ahmad N. Abou Tayoun, The Children's Hospital of Philadelphia

33 3615 Civic Center Boulevard, RM 716 ARC Bldg. Philadelphia, PA 19104

34 Office: 215-590-3856, Fax: 215-590-2156, Email: [aboutayoua@email.chop.edu](mailto:aboutayoua@email.chop.edu)

35

36

37 **Abstract**

38 Variant interpretation depends on accurate annotations using biologically relevant transcripts.  
39 We have developed a systematic strategy for designating primary transcripts, and applied it to  
40 109 hearing loss-associated genes that were divided into 3 categories. Category 1 genes (n=38)  
41 had a single transcript, Category 2 genes (n=32) had multiple transcripts, but a single transcript  
42 was sufficient to represent all exons, and Category 3 genes (n=38) had multiple transcripts with  
43 unique exons. Transcripts were curated with respect to gene expression reported in the literature  
44 and the Genotype-Tissue Expression Project. In addition, high frequency loss of function  
45 variants in the Genome Aggregation Database, and disease-causing variants in ClinVar and the  
46 Human Gene Mutation Database across the 109 genes were queried. These data were used to  
47 classify exons as "clinically relevant", "uncertain significance", or "clinically insignificant".  
48 Interestingly, 7% of all exons, containing >124 "clinically significant" variants, were of  
49 "uncertain significance". Finally, we used exon-level next generation sequencing quality metrics  
50 generated at two clinical labs, and identified a total of 43 technically challenging exons in 20  
51 different genes that had inadequate coverage and/or homology issues which might lead to false  
52 variant calls. We have demonstrated that transcript analysis plays a critical role in accurate  
53 clinical variant interpretation.

54

55

## 56 **Introduction**

57 With the rapid growth of genomic testing and the dropping cost of sequencing, proper analysis of  
58 genetic variants is critical for patient care. The American College of Medical Genetics and  
59 Genomics (ACMG) has set forth guidelines for the interpretation of sequence variants <sup>1</sup>.  
60 However, use of the guidelines requires an understanding of the transcriptional architecture of  
61 each gene. There can be several mRNA transcripts for each gene, and each laboratory  
62 individually determines which transcript to use when annotating, interpreting, and reporting  
63 variants in any gene. Human transcripts are currently designated and annotated by multiple  
64 groups. The most commonly used sets of coding transcripts that are currently available come  
65 from GENCODE (Ensembl and HAVANA, CCDS, LRG), UCSC, RefSeq (LRG), and AceView  
66 <sup>2-8</sup>. Each group annotates transcripts with a combination of computational and manual literature  
67 curation. Although current HGVS standards mention that describing variants in the context of  
68 exons and introns is optional <sup>9</sup>, in many genes there are exon-specific factors that influence  
69 interpretation and tracking this data on an exon level is important.

70 In addition to the above annotation challenges, technical limitations of NGS can also lead to  
71 inaccurate variant calls. Several genes contain coding sequences that can pose several technical  
72 problems, including sequences with high homology to other genomic regions, high GC content,  
73 and repetitive sequences. If a gene has significant sequence overlap with another gene or a  
74 pseudogene, it can be difficult to align the short NGS reads to the right genomic location, leading  
75 to false negative and/or false positive variant calls. DNA with high GC content is not easily  
76 amplified, and highly repetitive DNA is prone to sequencing and/or alignment errors. All such  
77 regions should be systematically investigated in the targeted genes of interest to address test  
78 limitations and design necessary ancillary assays <sup>10</sup>.

79 Upon passing sequencing quality metrics and filtration cutoffs, a rare variant would then be  
80 evaluated based on the most biologically relevant transcript for the disease of interest. It is  
81 common to choose the longest transcript for sequencing pipelines. However, variants are often  
82 evaluated in the context of this transcript, which does not necessarily encompass all essential  
83 exons and can also contain non-biologically functional exons. Thus, choosing a medically  
84 relevant transcript is essential for variant interpretation, and for understanding the molecular  
85 consequence of a variant on the gene's function.

86 Here we provide a framework for transcript curation and selection using a combination of tissue  
87 expression and genomic datasets, protein functional domains, and published work from animal  
88 and human studies. We apply this framework to hearing loss, a relatively common condition that  
89 affects 1 in 300 infants, half of which have a genetic etiology<sup>11</sup>. Due to the complexity of the  
90 auditory system, it is also highly heterogeneous with over 100 genes causative for nonsyndromic  
91 hearing loss alone<sup>12</sup>. We also use clinical NGS datasets generated at two different diagnostic  
92 laboratories to systematically highlight technically challenging regions across the hearing loss  
93 genes. We demonstrate the utility of our framework and its impact on variant annotation and  
94 interpretation. While our analysis was limited to hearing loss, we recommend that this guidance  
95 be used for all genes that are definitively associated with fully penetrant diseases.

## 96 **Methods**

### 97 **Transcript Curation process**

98 109 hearing loss-associated genes largely from the OtoGenome™ Test (GTR000509148.8) at the  
99 Laboratory for Molecular Medicine (LMM) were included for transcript curation. All known  
100 (NM) RefSeq transcripts in these genes were curated with respect to function, tissue specificity

101 and temporal expression from published literature (**Figure 1**). Exon-specific expression data  
102 were extracted from the Genotype-Tissue Expression Project (GTEx) on 01/15/18. GTEx was  
103 supported by the Common Fund of the Office of the Director of the National Institutes of Health,  
104 and by NCI, NHGRI, NHLBI, NIDA, NIMH, and NINDS. In addition, high allele frequency  
105 (>0.3%) predicted loss of function (LoF) variants (nonsense, frameshift and +/-1,2 splice site)  
106 were queried from the Genome Aggregation Database (gnomAD)<sup>13</sup>, and exons containing such  
107 LoFs were flagged. An allele frequency of 0.3% was chosen since variants in hearing loss genes  
108 that are above this frequency can be considered likely benign as defined by Duzkale et al<sup>14</sup>.

### 109 **Exon Numbering and Classification**

110 All coding and noncoding exons in the primary transcript were numbered sequentially. Coding  
111 and noncoding exons in minor transcripts were also numbered separately and sequentially per  
112 transcript. Transcripts were aligned and viewed using Alamut (Version 2.6.1 Interactive  
113 Biosoftware). Each minor transcript was given a different letter that was added after the exon  
114 number. For example, if there were two transcripts with unique alternate exon 1, they were  
115 numbered as 1A and 1B. To define a minimal curated transcript list, unique exons were listed in  
116 the minimal number of minor transcripts and the designated longest transcript contained the most  
117 coding bases (**Table 1, Supplemental Tables 1-3**).

118 Exons were classified as "clinically significant", "uncertain significance", or "clinically  
119 insignificant" (**Figure 1C**). Exons were classified as "clinically significant" if there was no  
120 evidence they were alternatively spliced, they did not contain high frequency exonic LoF  
121 variants, or they were supported by tissue-specific inner ear expression in the literature.  
122 "Uncertain significance" exons were spliced out of major transcripts, had no expression data and,  
123 for some, contained one high frequency LoF variant. Finally, "clinically insignificant" exons

124 were noncoding, had non-supporting human or animal tissue expression data, or had multiple  
125 high frequency LoF variants.

## 126 **Variant Counts**

127 Pathogenic (P), likely pathogenic (LP), benign (B), likely benign (LB) variants, and variants of  
128 uncertain clinical significance (VUS) in the ClinVar database <sup>15</sup> in addition to Disease Mutations  
129 (DMs) in the Human Gene Mutation Database (HGMD) <sup>16</sup> were counted across all uncertain and  
130 insignificant exons. Each variant was evaluated based on transcript location and predicted  
131 molecular consequence to the gene.

## 132 **Technically challenging regions**

133 Exon-level next generation sequencing (NGS) quality metrics, including average mapping  
134 quality (MQ) and average minimum depth of coverage (DP), were calculated across all 109  
135 genes using exome sequencing data. Exome targets were captured using the Agilent Clinical  
136 Research Exome (CRE) V5 kit, after which 2x100bp paired-end sequencing was performed on  
137 the Illumina HiSeq platform.

138 Exome sequencing using the above conditions was performed at the Children's Hospital of  
139 Philadelphia (CHOP) <sup>17</sup> and the Laboratory for Molecular Medicine (LMM) with an overall  
140 average coverage of ~100x and 180x, respectively. Poor quality regions as defined in **Results**  
141 section were compared between the two sites. Additionally, 87 of the 109 genes were targeted at  
142 the LMM using a custom-based capture kit (Agilent), followed by 2x150bp paired-end  
143 sequencing to an average coverage of ~600x. Exon-level NGS quality metrics from this capture-  
144 based sequencing approach were calculated and compared to those from exome sequencing.

## 145 **Results**

## 146 **Transcript curation**

147 A total of 109 genes on LMM's hearing loss panel were curated for clinically relevant transcripts  
148 as outlined in **Figure 1**. These genes had between 1 and 17 NCBI reference sequence RefSeq  
149 transcripts and between 1 and 72 unique exons, for a total of 340 unique transcripts and 2161  
150 unique exons across all genes (**Figure 2A**). Genes were divided into 3 categories using RefSeq  
151 transcripts<sup>5</sup>. All genes with only one RefSeq transcript were classified as category 1 (C1) genes.  
152 Genes with multiple transcripts were considered category 2 (C2) genes if the longest transcript  
153 included all annotated exons and those with multiple transcripts and mutually exclusive exons  
154 were grouped under category 3 (C3) (**Figure 1**).

155 **Category 1 genes.** Of the 109 genes evaluated, 38 had a single RefSeq transcript each with an  
156 average of 19 exons (total of 38 transcripts and 725 exons across 38 genes, **Figure 2A** and  
157 **Supplementary Table 1**). Because each gene had only one known RefSeq transcript, C1  
158 transcripts had minimal curation and almost all exons, except for noncoding ones (n=24), were  
159 considered to be critical for inclusion in diagnostic testing and variant interpretation.  
160 Interestingly, however, based on exon-level counts of high allele frequency loss of function  
161 (LoF) variants in the general population (see **Methods**), there was one insignificant exon  
162 (*MYO15A*, NM\_016239.3, Exon 26) and another of uncertain significance (*ATP6V1B1*,  
163 NM\_001692.3, Exon 1) in this category.

164 The *MYO15A* exon 26 contained a nonsense variant (c.5925G>A; p.Trp1975\*) that was present  
165 in 1.3% (316/23,712) South Asian alleles including 3 homozygotes in the Genome Aggregation  
166 Database (gnomAD). Interestingly, RNA sequencing data from the Genotype-Tissue Expression  
167 (GTEx) study showed that this exon is not expressed across all tested tissues. We therefore  
168 considered this exon to be clinically insignificant and that variants identified therein are more

169 likely to be benign. The *ATP6V1B1* exon 1 contained a start loss variant (c.2T>C; p.M1?) that  
170 was present in 40% total alleles in gnomAD, including 23,280 homozygotes. It is possible that  
171 the exon start is erroneously annotated or that re-initiation might occur elsewhere, including at  
172 any of the two downstream methionines in this exon. However, there is currently no functional  
173 data to support either possibility or to rule out potential re-initiation at downstream exons. We  
174 therefore classified this exon as uncertain clinical significance wherein sequence variants should  
175 be carefully interpreted.

176 **Category 2 genes.** This category included 33 genes each with an average of 4 transcripts and 18  
177 unique exons (**Figure 2A** and **Supplementary Table 2**). A total of 118 transcripts, including 582  
178 unique exons, were curated in this category. Although the longest transcript represented all  
179 annotated RefSeq exons and was presumed to be the major transcript for C2 genes, we curated  
180 the shorter (minor) transcripts for potentially identifying non-biologically or non-clinically  
181 relevant exons in the longer transcript. Apart from the 23 noncoding exons in these genes, there  
182 were 26 coding exons not contained in minor transcripts, thus questioning their clinical relevance  
183 (**Figure 2B**). Of those, 7 exons were not expressed in any tissue in the GTEx database including  
184 4 exons (*CCDC50* exon 6, *DFNA5* exon 2, *EDN3* exon 4, and *ILDR1* exon 6) harboring high  
185 allele frequency LoF variants in gnomAD (**Supplementary Table 2**). Of the 15 exons that  
186 showed expression in the GTEx database, 5 exons (*CEP78* exons 1, 2, and 16, *DFNA5* exon 6,  
187 and *KARS* exon 15) also contained high frequency LoF variants in gnomAD (**Supplementary**  
188 **Table 2**), while the remaining 10 exons did not, although more information is needed to clarify  
189 their biological or clinical relevance.

190 An illustrative example in this category is the *EDN3* gene known to cause Waardenburg  
191 syndrome (WS) type 4<sup>18, 19</sup>. This gene has 5 RefSeq transcripts sharing coding exons 1-3 and 5



192 but differing in the inclusion of coding exon 4. Specifically, the NM\_001302456.1 and  
193 NM\_207033.2 transcripts do not contain the fourth coding exon shared by the three other  
194 transcripts (**Figure 3**). Interestingly, a frameshift variant (NM\_207034.2: c.559\_560insA;  
195 p.Thr189Asnfs) in this exon was present in 0.6% (157/25790) Finnish European alleles in  
196 gnomAD, with a high quality variant score, including 2 homozygotes (**Figure 3**), supporting the  
197 clinical insignificance of this exon.

198 **Category 3 genes.** There were 38 genes in this category, each with an average of 5 transcripts  
199 and 22 unique exons (**Figure 2A** and **Supplementary Table 3**). In total, C3 genes had 184  
200 RefSeq transcripts and 854 unique exons. Given the multiple transcripts with mutually exclusive  
201 exons in this category, a thorough curation was carried out to select the most clinically relevant  
202 transcript for each C3 gene (**Supplementary Table 3**). Published human and/or animal tissue  
203 expression studies supported transcript selection for 30 C3 genes; the longest transcript was  
204 supported in 25 genes while a shorter isoform was most relevant in 5 genes. There were no  
205 expression data to guide selection of the most biologically relevant transcript for 8 C3 genes for  
206 which we defaulted to the longest transcript. Overall, 104 coding exons in the C3 genes met our  
207 criteria for “uncertain significance”, while 7 coding exons were classified as "clinically  
208 insignificant" (see **Methods** and **Figure 2B**).

209 A C3 example is the *PAX3* gene which is a common cause of WS, type 1<sup>20-22</sup>. This gene has 8  
210 RefSeq transcripts with varied tissue and temporal expression<sup>23-25</sup>, and with significant  
211 alternative splicing; a transcript can include 4, 5, 8, 9, or 10 exons. Certain exons use alternate  
212 splice junctions which can also change reading frame for the terminal exon (**Figure 4A**).  
213 Interestingly, one putative LoF variant (c.638C>A; p.S213\*) in exon 4d of the NM\_000438.5  
214 transcript was found in 0.54% (166/30,592) South Asian alleles including one homozygous

215 individual. This allele frequency is inconsistent with the estimated disease prevalence for  
216 autosomal dominant WS of approximately 1/40,000<sup>22, 26</sup>. Exon 4d is only 20 amino acids longer  
217 than exon 4 on all other transcripts. Human expression data in the GTEx database strongly  
218 supports usage of the exon 4 (and not 4d) splice donor site, suggesting that exon 4d is not  
219 biologically relevant (**Figure 4B**).

220 Similarly, exon 8c in the NM\_181460.3 transcript of the *PAX3* gene is unlikely to be biologically  
221 relevant as supported by lack of its expression (GTEx database) and the presence of a putative  
222 LoF splicing variant (c.1024+1G>C) impacting this exon in 0.15% (47/30,764) South Asian  
223 alleles in gnomAD. This same variant has a missense effect (p.Arg402Pro) on the NM\_181461.3  
224 transcript, further highlighting the importance of appropriate transcript selection for variant  
225 annotation and interpretation (**Figure 4C**).

#### 226 **Impact on clinical testing and interpretation**

227 Transcript selection can significantly alter variant interpretation because variants can have  
228 differing molecular consequences on each transcript. For example, pathogenic missense and  
229 nonsense variants in the *MITF* gene, encoding a transcription factor critical for melanocyte  
230 development, are known to cause WS, type 2<sup>22, 27</sup>. This gene has 13 curated RefSeq transcripts.  
231 On 4 out of 13 transcripts, a particular pathogenic variant (which segregated with disease in >10  
232 members of a family with WS<sup>27</sup>) is annotated as a variant in a +1 canonical splice donor site  
233 (c.33+1G>A). However, this nucleotide change is a deep intronic variant in the other 9  
234 transcripts (e.g. NM\_001184967.1:c.199-1066G>A), and could easily be misclassified if only the  
235 deep intronic consequence were interpreted.

236 Tissue-specific transcript expression can also significantly alter variant interpretation. Variants in  
237 *TBC1D24*, a GTPase-activating protein, are associated with either nonsyndromic hearing loss,  
238 DOORS syndrome, or a spectrum of epilepsy conditions <sup>28-33</sup>. This gene has 2 curated RefSeq  
239 transcripts: NM\_001199107.1, the longest which contains 8 exons and is most abundant in  
240 mouse neurons, and NM\_020705.2, which is missing exon 3, contains only 7 exons, and is  
241 expressed in mouse cochlea and non-neuronal tissues <sup>29</sup>. NM\_001199107.1:c.969\_970delGT  
242 (p.Ser324Thrfs), a frameshift variant in exon 3, is not present in the shorter transcript and was  
243 identified in the homozygous state in five members of a consanguineous family with severe  
244 lethal epileptic encephalopathy but no hearing loss, thereby supporting the tissue-specific  
245 expression of the longest transcript <sup>31</sup>.

246 Based on our comprehensive curation of all transcripts, there were 139 coding exons with no or  
247 uncertain clinical significance, constituting 7% of all 2089 coding exons across all 109 genes  
248 (**Figure 2B**). Because of the limited evidence supporting those exons' clinical relevance,  
249 variants therein should be carefully interpreted as they can be a source of false positive  
250 diagnoses. Interestingly, there are 124 variants that are labeled as disease causing (DM or P/LP)  
251 in disease databases (HGMD and ClinVar, respectively), in addition to 224 VUSs and 151 B/LB  
252 variants across those exons (**Figure 2C**). These variants interpreted as clinically significant will  
253 all require further assessment to ensure sufficient evidence is present to implicate them in  
254 hearing loss. This highlights the importance of our transcript curation approach and the impact it  
255 could have on functional and clinical annotations.

## 256 **Technical Assessment**

257 Due to its genetic heterogeneity, most clinical genetics laboratories use targeted or exome-based  
258 panels to sequence a comprehensive set of genes known to cause hearing loss. Although very

259 robust, such approaches have limitations inherent to the next generation sequencing (NGS)  
260 technology including the inability to reliably capture and sequence low complexity and/or high  
261 homology genomic regions.

262 We sought to identify regions in a set of 109 hearing loss genes that are technically challenging  
263 to sequence using current short read (100-150bp) NGS in clinical laboratories. We used clinical  
264 exome sequencing data generated in two different sites (CHOP and LMM) to calculate exon-  
265 level quality metrics across all exons in the 109 hearing loss genes. We have recently shown that  
266 an average mapping quality (MQ) and/or an average minimum depth of coverage (DP) cutoffs of  
267 20 and/or 15, respectively, are strong indicators of poor quality regions<sup>17</sup>. We identified 43 well-  
268 baited (~90% baited bases) exons in 20 genes with the above cutoffs despite being exome  
269 sequenced to an overall average coverage of up to 180x at the two clinical laboratories  
270 (**Supplementary Table 4** and **methods**). Of those, 31 exons were sequenced to an overall  
271 coverage of ~600x using a different targeted capture (average % baited exons: 95%) and longer  
272 reads (150bp), but still had low quality metrics (**Supplementary Table 4**).

273 The 43 regions included exons with high homology to other genomic sequences (n=21 exons in  
274 *STRC* and *OTOA*) or exons that have GC-rich or repeat sequences (n=22, e.g. *KCNQ1*, *MYO15A*,  
275 and *TPRN*) (**Figure 5**). It is unlikely that sequence variants in all 43 exons will be reliably  
276 detected using available NGS chemistries, and therefore false positive and/or false negative  
277 variant calls in those exons should be highly expected.

## 278 **Discussion**

279 Transcript selection is critical for determining DNA variants' potential effects on RNA and/or  
280 protein expression, function and stability. This annotation, in turn, significantly impacts variant

281 interpretation. Although most clinical laboratories use one set of coding transcripts (commonly  
282 RefSeq) for variant annotation, any set might contain multiple transcripts for each gene; some of  
283 which are true clinically relevant isoforms, while others can be false annotations. Even for those  
284 genes with multiple isoforms, deciphering the relevant isoform for a given disease – often based  
285 on tissue-specific expression data – is necessary for interpretation. In the absence of uniform  
286 guidelines for transcript selection, each lab applies different internal rules for identifying the  
287 most appropriate transcript(s) for interpretation and reporting.

288 Here we provide a comprehensive evidence-based framework for transcript curation and  
289 selection. We apply this framework to 109 hearing loss genes, and illustrate its utility in  
290 transcript selection and variant annotation and interpretation. We also use a new exon  
291 classification system, and show that 7% of all coding (RefSeq) exons in these genes have no or  
292 questionable clinical validity rendering them a potential source of false variant calls irrespective  
293 of their predicted protein effect (missense, loss of function, etc.).

294 A challenge with our approach is that it requires significant manual curation, though such  
295 curation is essential for accurate interpretation, and is arguably more effective if performed  
296 ahead of testing, and not retrospectively to minimize analysis and wet bench burdens. Another  
297 challenge is that it is highly dependent on availability of human and/or animal expression data in  
298 the relevant disease tissue – the inner ear in this current work. However, leveraging existing  
299 large human genomic population (gnomAD) and transcriptome (GTEx) sequencing data as well  
300 as high quality variant databases (ClinVar) can support the selection of clinically relevant  
301 transcripts in our genes.

302 Finally, we use exon-level NGS quality metrics to highlight regions that are inaccessible to  
303 sequencing and/or accurate variant calling, especially with short read (100-150bp) chemistries

304 that are mostly used in clinical and research labs. It is possible that some of those regions can be  
305 recovered with longer reads and improved bioinformatics pipelines. Until then, however, it is  
306 highly important that different ancillary assays, such as Sanger sequencing, be validated to  
307 accurately capture sequence variants in those regions.

308 In summary, we recommend that our transcript selection framework and exon classification  
309 system be used in other disease areas for more efficient and accurate variant interpretation, and  
310 to avoid erroneous annotations and, potentially, misdiagnoses.

### 311 **Acknowledgements**

312 Research reported in this publication was supported by the National Human Genome Research  
313 Institute (NHGRI), in conjunction with additional funding from the Eunice Kennedy Shriver  
314 National Institute of Child Health and Human Development (NICHD) under award number:  
315 U41HG006834. The content is solely the responsibility of the authors and does not necessarily  
316 represent the official views of the National Institutes of Health.

317

318

## 319 **References**

- 320 1. Richards S, Aziz N, Bale S, Bick D, Das S, Gastier-Foster J, Grody WW, Hegde M, Lyon E,  
321 Spector E, Voelkerding K, Rehm HL: Standards and guidelines for the interpretation of sequence  
322 variants: a joint consensus recommendation of the American College of Medical Genetics and  
323 Genomics and the Association for Molecular Pathology. *Genet Med*, 17:405-424.
- 324 2. Harrow J, Frankish A, Gonzalez JM, Tapanari E, Diekhans M, Kokocinski F, Aken BL, Barrell  
325 D, Zadissa A, Searle S, Barnes I, Bignell A, Boychenko V, Hunt T, Kay M, Mukherjee G, Rajan  
326 J, Despacio-Reyes G, Saunders G, Steward C, Harte R, Lin M, Howald C, Tanzer A, Derrien T,  
327 Chrast J, Walters N, Balasubramanian S, Pei B, Tress M, Rodriguez JM, Ezkurdia I, van Baren J,  
328 Brent M, Haussler D, Kellis M, Valencia A, Reymond A, Gerstein M, Guigo R, Hubbard TJ:  
329 GENCODE: the reference human genome annotation for The ENCODE Project. *Genome Res*,  
330 22:1760-1774.
- 331 3. Casper J, Zweig AS, Villarreal C, Tyner C, Speir ML, Rosenbloom KR, Raney BJ, Lee CM, Lee  
332 BT, Karolchik D, Hinrichs AS, Haeussler M, Guruvadoo L, Navarro Gonzalez J, Gibson D,  
333 Fiddes IT, Eisenhart C, Diekhans M, Clawson H, Barber GP, Armstrong J, Haussler D, Kuhn  
334 RM, Kent WJ: The UCSC Genome Browser database: 2018 update. *Nucleic Acids Res*, 46:D762-  
335 D769.
- 336 4. Rosenbloom KR, Sloan CA, Malladi VS, Dreszer TR, Learned K, Kirkup VM, Wong MC,  
337 Maddren M, Fang R, Heitner SG, Lee BT, Barber GP, Harte RA, Diekhans M, Long JC, Wilder  
338 SP, Zweig AS, Karolchik D, Kuhn RM, Haussler D, Kent WJ: ENCODE data in the UCSC  
339 Genome Browser: year 5 update. *Nucleic Acids Res*, 41:D56-63.
- 340 5. O'Leary NA, Wright MW, Brister JR, Ciufu S, Haddad D, McVeigh R, Rajput B, Robbertse B,  
341 Smith-White B, Ako-Adjei D, Astashyn A, Badretdin A, Bao Y, Blinkova O, Brover V,  
342 Chetvermin V, Choi J, Cox E, Ermolaeva O, Farrell CM, Goldfarb T, Gupta T, Haft D, Hatcher E,  
343 Hlavina W, Joardar VS, Kodali VK, Li W, Maglott D, Masterson P, McGarvey KM, Murphy

- 344 MR, O'Neill K, Pujar S, Rangwala SH, Rausch D, Riddick LD, Schoch C, Shkeda A, Storz SS,  
345 Sun H, Thibaud-Nissen F, Tolstoy I, Tully RE, Vatsan AR, Wallin C, Webb D, Wu W, Landrum  
346 MJ, Kimchi A, Tatusova T, DiCuccio M, Kitts P, Murphy TD, Pruitt KD: Reference sequence  
347 (RefSeq) database at NCBI: current status, taxonomic expansion, and functional annotation.  
348 *Nucleic Acids Res*, 44:D733-745.
- 349 6. Thierry-Mieg D, Thierry-Mieg J: AceView: a comprehensive cDNA-supported gene and  
350 transcripts annotation. *Genome Biol* 2006, 7 Suppl 1:S12 11-14.
- 351 7. Pruitt KD, Harrow J, Harte RA, Wallin C, Diekhans M, Maglott DR, Searle S, Farrell CM,  
352 Loveland JE, Ruffier M, Hart E, Suner MM, Landrum MJ, Aken B, Ayling S, Baertsch R,  
353 Fernandez-Banet J, Cherry JL, Curwen V, DiCuccio M, Kellis M, Lee J, Lin MF, Schuster M,  
354 Shkeda A, Amid C, Brown G, Dukhanina O, Frankish A, Hart J, Maidak BL, Mudge J, Murphy  
355 MR, Murphy T, Rajan J, Rajput B, Riddick LD, Snow C, Steward C, Webb D, Weber JA,  
356 Wilming L, Wu W, Birney E, Haussler D, Hubbard T, Ostell J, Durbin R, Lipman D: The  
357 consensus coding sequence (CCDS) project: Identifying a common protein-coding gene set for  
358 the human and mouse genomes. *Genome Res* 2009, 19:1316-1323.
- 359 8. Aken BL, Achuthan P, Akanni W, Amode MR, Bernsdorff F, Bhai J, Billis K, Carvalho-Silva D,  
360 Cummins C, Clapham P, Gil L, Giron CG, Gordon L, Hourlier T, Hunt SE, Janacek SH,  
361 Juettemann T, Keenan S, Laird MR, Lavidas I, Maurel T, McLaren W, Moore B, Murphy DN,  
362 Nag R, Newman V, Nuhn M, Ong CK, Parker A, Patricio M, Riat HS, Sheppard D, Sparrow H,  
363 Taylor K, Thormann A, Vullo A, Walts B, Wilder SP, Zadissa A, Kostadima M, Martin FJ,  
364 Muffato M, Perry E, Ruffier M, Staines DM, Trevanion SJ, Cunningham F, Yates A, Zerbino  
365 DR, Flicek P: Ensembl 2017. *Nucleic Acids Res*, 45:D635-D642.
- 366 9. den Dunnen JT, Dalgleish R, Maglott DR, Hart RK, Greenblatt MS, McGowan-Jordan J, Roux  
367 AF, Smith T, Antonarakis SE, Taschner PE: HGVS Recommendations for the Description of  
368 Sequence Variants: 2016 Update. *Hum Mutat*, 37:564-569.



- 369 10. Roy S, Coldren C, Karunamurthy A, Kip NS, Klee EW, Lincoln SE, Leon A, Pullambhatla M,  
370 Temple-Smolkin RL, Voelkerding KV, Wang C, Carter AB: Standards and Guidelines for  
371 Validating Next-Generation Sequencing Bioinformatics Pipelines: A Joint Recommendation of  
372 the Association for Molecular Pathology and the College of American Pathologists. *J Mol Diagn*,  
373 20:4-27.
- 374 11. Alford RL, Arnos KS, Fox M, Lin JW, Palmer CG, Pandya A, Rehm HL, Robin NH, Scott DA,  
375 Yoshinaga-Itano C: American College of Medical Genetics and Genomics guideline for the  
376 clinical evaluation and etiologic diagnosis of hearing loss. *Genet Med*, 16:347-355.
- 377 12. Abou Tayoun AN, Al Turki SH, Oza AM, Bowser MJ, Hernandez AL, Funke BH, Rehm HL,  
378 Amr SS: Improving hearing loss gene testing: a systematic review of gene evidence toward more  
379 efficient next-generation sequencing-based diagnostic testing and interpretation. *Genet Med*,  
380 18:545-553.
- 381 13. Lek M, Karczewski KJ, Minikel EV, Samocha KE, Banks E, Fennell T, O'Donnell-Luria AH,  
382 Ware JS, Hill AJ, Cummings BB, Tukiainen T, Birnbaum DP, Kosmicki JA, Duncan LE, Estrada  
383 K, Zhao F, Zou J, Pierce-Hoffman E, Berghout J, Cooper DN, Deflaux N, DePristo M, Do R,  
384 Flannick J, Fromer M, Gauthier L, Goldstein J, Gupta N, Howrigan D, Kiezun A, Kurki MI,  
385 Moonshine AL, Natarajan P, Orozco L, Peloso GM, Poplin R, Rivas MA, Ruano-Rubio V, Rose  
386 SA, Ruderfer DM, Shakir K, Stenson PD, Stevens C, Thomas BP, Tiao G, Tusie-Luna MT,  
387 Weisburd B, Won HH, Yu D, Altshuler DM, Ardissino D, Boehnke M, Danesh J, Donnelly S,  
388 Elosua R, Florez JC, Gabriel SB, Getz G, Glatt SJ, Hultman CM, Kathiresan S, Laakso M,  
389 McCarroll S, McCarthy MI, McGovern D, McPherson R, Neale BM, Palotie A, Purcell SM,  
390 Saleheen D, Scharf JM, Sklar P, Sullivan PF, Tuomilehto J, Tsuang MT, Watkins HC, Wilson  
391 JG, Daly MJ, MacArthur DG: Analysis of protein-coding genetic variation in 60,706 humans.  
392 *Nature*, 536:285-291.

- 393 14. Duzkale H, Shen J, McLaughlin H, Alfares A, Kelly MA, Pugh TJ, Funke BH, Rehm HL, Lebo  
394 MS: A systematic approach to assessing the clinical significance of genetic variants. *Clin Genet*,  
395 84:453-463.
- 396 15. Landrum MJ, Lee JM, Benson M, Brown G, Chao C, Chitipiralla S, Gu B, Hart J, Hoffman D,  
397 Hoover J, Jang W, Katz K, Ovetsky M, Riley G, Sethi A, Tully R, Villamarin-Salomon R,  
398 Rubinstein W, Maglott DR: ClinVar: public archive of interpretations of clinically relevant  
399 variants. *Nucleic Acids Res*, 44:D862-868.
- 400 16. Stenson PD, Mort M, Ball EV, Shaw K, Phillips A, Cooper DN: The Human Gene Mutation  
401 Database: building a comprehensive mutation repository for clinical and molecular genetics,  
402 diagnostic testing and personalized genomic medicine. *Hum Genet*, 133:1-9.
- 403 17. Niazi R, Gonzalez MA, Balciuniene J, Evans P, Sarmady M, Abou Tayoun AN: ExomeSlicer: a  
404 resource for the development and validation of exome-based clinical panels. *bioRxiv*.
- 405 18. Ederly P, Attie T, Amiel J, Pelet A, Eng C, Hofstra RM, Martelli H, Bidaud C, Munnich A,  
406 Lyonnet S: Mutation of the endothelin-3 gene in the Waardenburg-Hirschsprung disease (Shah-  
407 Waardenburg syndrome). *Nat Genet* 1996, 12:442-444.
- 408 19. Hofstra RM, Osinga J, Tan-Sindhunata G, Wu Y, Kamsteeg EJ, Stulp RP, van Ravenswaaij-Arts  
409 C, Majoor-Krakauer D, Angrist M, Chakravarti A, Meijers C, Buys CH: A homozygous mutation  
410 in the endothelin-3 gene associated with a combined Waardenburg type 2 and Hirschsprung  
411 phenotype (Shah-Waardenburg syndrome). *Nat Genet* 1996, 12:445-447.
- 412 20. Baldwin CT, Hoth CF, Amos JA, da-Silva EO, Milunsky A: An exonic mutation in the HuP2  
413 paired domain gene causes Waardenburg's syndrome. *Nature* 1992, 355:637-638.
- 414 21. Tassabehji M, Read AP, Newton VE, Harris R, Balling R, Gruss P, Strachan T: Waardenburg's  
415 syndrome patients have mutations in the human homologue of the Pax-3 paired box gene. *Nature*  
416 1992, 355:635-636.
- 417 22. Song J, Feng Y, Acke FR, Coucke P, Vleminckx K, Dhooge IJ: Hearing loss in Waardenburg  
418 syndrome: a systematic review. *Clin Genet*.

- 419 23. Blake JA, Ziman MR: Pax3 transcripts in melanoblast development. *Dev Growth Differ* 2005,  
420 47:627-635.
- 421 24. Monsoro-Burq AH: PAX transcription factors in neural crest development. *Semin Cell Dev Biol*,  
422 44:87-96.
- 423 25. Tsukamoto K, Nakamura Y, Niikawa N: Isolation of two isoforms of the PAX3 gene transcripts  
424 and their tissue-specific alternative expression in human adult tissues. *Hum Genet* 1994, 93:270-  
425 274.
- 426 26. Shi Y, Li X, Ju D, Li Y, Zhang X, Zhang Y: A novel mutation of the MITF gene in a family with  
427 Waardenburg syndrome type 2: A case report. *Exp Ther Med*, 11:1516-1518.
- 428 27. Tassabehji M, Newton VE, Read AP: Waardenburg syndrome type 2 caused by mutations in the  
429 human microphthalmia (MITF) gene. *Nat Genet* 1994, 8:251-255.
- 430 28. Azaiez H, Booth KT, Bu F, Huygen P, Shibata SB, Shearer AE, Kolbe D, Meyer N, Black-  
431 Ziegelbein EA, Smith RJ: TBC1D24 mutation causes autosomal-dominant nonsyndromic hearing  
432 loss. *Hum Mutat*, 35:819-823.
- 433 29. Rehman AU, Santos-Cortez RL, Morell RJ, Drummond MC, Ito T, Lee K, Khan AA, Basra MA,  
434 Wasif N, Ayub M, Ali RA, Raza SI, Nickerson DA, Shendure J, Bamshad M, Riazuddin S,  
435 Billington N, Khan SN, Friedman PL, Griffith AJ, Ahmad W, Leal SM, Friedman TB: Mutations  
436 in TBC1D24, a gene associated with epilepsy, also cause nonsyndromic deafness DFNB86. *Am J*  
437 *Hum Genet*, 94:144-152.
- 438 30. Falace A, Filipello F, La Padula V, Vanni N, Madia F, De Pietri Tonelli D, de Falco FA, Striano  
439 P, Dagna Bricarelli F, Minetti C, Benfenati F, Fassio A, Zara F: TBC1D24, an ARF6-interacting  
440 protein, is mutated in familial infantile myoclonic epilepsy. *Am J Hum Genet*, 87:365-370.
- 441 31. Guven A, Tolun A: TBC1D24 truncating mutation resulting in severe neurodegeneration. *J Med*  
442 *Genet*, 50:199-202.
- 443 32. Campeau PM, Kasperaviciute D, Lu JT, Burrage LC, Kim C, Hori M, Powell BR, Stewart F,  
444 Felix TM, van den Ende J, Wisniewska M, Kayserili H, Rump P, Nampoothiri S, Aftimos S, Mey

- 445 A, Nair LD, Begleiter ML, De Bie I, Meenakshi G, Murray ML, Repetto GM, Golabi M, Blair E,  
446 Male A, Giuliano F, Kariminejad A, Newman WG, Bhaskar SS, Dickerson JE, Kerr B, Banka S,  
447 Giltay JC, Wieczorek D, Tostevin A, Wiszniewska J, Cheung SW, Hennekam RC, Gibbs RA,  
448 Lee BH, Sisodiya SM: The genetic basis of DOORS syndrome: an exome-sequencing study.  
449 *Lancet Neurol*, 13:44-58.
- 450 33. Zhang L, Hu L, Chai Y, Pang X, Yang T, Wu H: A dominant mutation in the stereocilia-  
451 expressing gene TBC1D24 is a probable cause for nonsyndromic hearing impairment. *Hum*  
452 *Mutat*, 35:814-818.
- 453 34. Modamio-Hoybjor S, Mencia A, Goodyear R, del Castillo I, Richardson G, Moreno F, Moreno-  
454 Pelayo MA: A mutation in CCDC50, a gene encoding an effector of epidermal growth factor-  
455 mediated cell signaling, causes progressive hearing loss. *Am J Hum Genet* 2007, 80:1076-1089.
- 456 35. Namburi P, Ratnapriya R, Khateb S, Lazar CH, Kinarty Y, Obolensky A, Erdinest I, Marks-  
457 Ohana D, Pras E, Ben-Yosef T, Newman H, Gross M, Swaroop A, Banin E, Sharon D: Bi-allelic  
458 Truncating Mutations in CEP78, Encoding Centrosomal Protein 78, Cause Cone-Rod  
459 Degeneration with Sensorineural Hearing Loss. *Am J Hum Genet* 2016, 99:777-784.
- 460 36. Robertson NG, Resendes BL, Lin JS, Lee C, Aster JC, Adams JC, Morton CC: Inner ear  
461 localization of mRNA and protein products of COCH, mutated in the sensorineural deafness and  
462 vestibular disorder, DFNA9. *Hum Mol Genet* 2001, 10:2493-2500.
- 463 37. Robertson NG, Skvorak AB, Yin Y, Weremowicz S, Johnson KR, Kovatch KA, Battey JF,  
464 Bieber FR, Morton CC: Mapping and characterization of a novel cochlear gene in human and in  
465 mouse: a positional candidate gene for a deafness disorder, DFNA9. *Genomics* 1997, 46:345-354.
- 466 38. Van Laer L, Huizing EH, Verstreken M, van Zuijlen D, Wauters JG, Bossuyt PJ, Van de Heyning  
467 P, McGuirt WT, Smith RJ, Willems PJ, Legan PK, Richardson GP, Van Camp G: Nonsyndromic  
468 hearing impairment is associated with a mutation in DFNA5. *Nat Genet* 1998, 20:194-197.
- 469 39. Delmaghani S, del Castillo FJ, Michel V, Leibovici M, Aghaie A, Ron U, Van Laer L, Ben-Tal  
470 N, Van Camp G, Weil D, Langa F, Lathrop M, Avan P, Petit C: Mutations in the gene encoding

- 471 pejvakin, a newly identified protein of the afferent auditory pathway, cause DFNB59 auditory  
472 neuropathy. *Nat Genet* 2006, 38:770-778.
- 473 40. Cheng J, Zhu Y, He S, Lu Y, Chen J, Han B, Petrillo M, Wrzeszczynski KO, Yang S, Dai P, Zhai  
474 S, Han D, Zhang MQ, Li W, Liu X, Li H, Chen ZY, Yuan H: Functional mutation of  
475 SMAC/DIABLO, encoding a mitochondrial proapoptotic protein, causes human progressive  
476 hearing loss DFNA64. *Am J Hum Genet* 2011, 89:56-66.
- 477 41. Grifa A, Wagner CA, D'Ambrosio L, Melchionda S, Bernardi F, Lopez-Bigas N, Rabionet R,  
478 Arbones M, Monica MD, Estivill X, Zelante L, Lang F, Gasparini P: Mutations in GJB6 cause  
479 nonsyndromic autosomal dominant deafness at DFNA3 locus. *Nat Genet* 1999, 23:16-18.
- 480 42. Borck G, Ur Rehman A, Lee K, Pogoda HM, Kakar N, von Ameln S, Grillet N, Hildebrand MS,  
481 Ahmed ZM, Nurnberg G, Ansar M, Basit S, Javed Q, Morell RJ, Nasreen N, Shearer AE, Ahmad  
482 A, Kahrizi K, Shaikh RS, Ali RA, Khan SN, Goebel I, Meyer NC, Kimberling WJ, Webster JA,  
483 Stephan DA, Schiller MR, Bahlo M, Najmabadi H, Gillespie PG, Nurnberg P, Wollnik B,  
484 Riazuddin S, Smith RJ, Ahmad W, Muller U, Hammerschmidt M, Friedman TB, Riazuddin S,  
485 Leal SM, Ahmad J, Kubisch C: Loss-of-function mutations of ILDR1 cause autosomal-recessive  
486 hearing impairment DFNB42. *Am J Hum Genet* 2011, 88:127-137.
- 487 43. Santos-Cortez RL, Lee K, Azeem Z, Antonellis PJ, Pollock LM, Khan S, Irfanullah, Andrade-  
488 Elizondo PB, Chiu I, Adams MD, Basit S, Smith JD, University of Washington Center for  
489 Mendelian G, Nickerson DA, McDermott BM, Jr., Ahmad W, Leal SM: Mutations in KARS,  
490 encoding lysyl-tRNA synthetase, cause autosomal-recessive nonsyndromic hearing impairment  
491 DFNB89. *Am J Hum Genet* 2013, 93:132-140.
- 492 44. Beisel KW, Rocha-Sanchez SM, Morris KA, Nie L, Feng F, Kachar B, Yamoah EN, Fritzsche B:  
493 Differential expression of KCNQ4 in inner hair cells and sensory neurons is the basis of  
494 progressive high-frequency hearing loss. *J Neurosci* 2005, 25:9285-9293.

- 495 45. Xu T, Nie L, Zhang Y, Mo J, Feng W, Wei D, Petrov E, Calisto LE, Kachar B, Beisel KW,  
496 Vazquez AE, Yamoah EN: Roles of alternative splicing in the functional properties of inner ear-  
497 specific KCNQ4 channels. *J Biol Chem* 2007, 282:23899-23909.
- 498 46. Zazo Seco C, Serrao de Castro L, van Nierop JW, Morin M, Jhangiani S, Verver EJ, Schraders  
499 M, Maiwald N, Wesdorp M, Venselaar H, Spruijt L, Oostrik J, Schoots J, Baylor-Hopkins Center  
500 for Mendelian G, van Reeuwijk J, Lelieveld SH, Huygen PL, Insenser M, Admiraal RJ, Pennings  
501 RJ, Hoefsloot LH, Arias-Vasquez A, de Ligt J, Yntema HG, Jansen JH, Muzny DM, Huls G, van  
502 Rossum MM, Lupski JR, Moreno-Pelayo MA, Kunst HP, Kremer H: Allelic Mutations of  
503 KITLG, Encoding KIT Ligand, Cause Asymmetric and Unilateral Hearing Loss and  
504 Waardenburg Syndrome Type 2. *Am J Hum Genet* 2015, 97:647-660.
- 505 47. Riazuddin S, Ahmed ZM, Fanning AS, Lagziel A, Kitajiri S, Ramzan K, Khan SN, Chattaraj P,  
506 Friedman PL, Anderson JM, Belyantseva IA, Forge A, Riazuddin S, Friedman TB: Tricellulin is  
507 a tight-junction protein necessary for hearing. *Am J Hum Genet* 2006, 79:1040-1051.
- 508 48. Ahituv N, Sobe T, Robertson NG, Morton CC, Taggart RT, Avraham KB: Genomic structure of  
509 the human unconventional myosin VI gene. *Gene* 2000, 261:269-275.
- 510 49. Rehman AU, Santos-Cortez RL, Morell RJ, Drummond MC, Ito T, Lee K, Khan AA, Basra MA,  
511 Wasif N, Ayub M, Ali RA, Raza SI, University of Washington Center for Mendelian G,  
512 Nickerson DA, Shendure J, Bamshad M, Riazuddin S, Billington N, Khan SN, Friedman PL,  
513 Griffith AJ, Ahmad W, Riazuddin S, Leal SM, Friedman TB: Mutations in TBC1D24, a gene  
514 associated with epilepsy, also cause nonsyndromic deafness DFNB86. *Am J Hum Genet* 2014,  
515 94:144-152.
- 516 50. Adato A, Lefevre G, Delprat B, Michel V, Michalski N, Chardenoux S, Weil D, El-Amraoui A,  
517 Petit C: Usherin, the defective protein in Usher syndrome type IIA, is likely to be a component of  
518 interstereocilia ankle links in the inner ear sensory cells. *Hum Mol Genet* 2005, 14:3921-3932.

- 519 51. Mathur PD, Zou J, Zheng T, Almishaal A, Wang Y, Chen Q, Wang L, Vashist D, Brown S, Park  
520 A, Yang J: Distinct expression and function of whirlin isoforms in the inner ear and retina: an  
521 insight into pathogenesis of USH2D and DFNB31. *Hum Mol Genet* 2015, 24:6213-6228.
- 522 52. Yang J, Liu X, Zhao Y, Adamian M, Pawlyk B, Sun X, McMillan DR, Liberman MC, Li T:  
523 Ablation of whirlin long isoform disrupts the USH2 protein complex and causes vision and  
524 hearing loss. *PLoS Genet* 2010, 6:e1000955.
- 525 53. Ebrahim S, Ingham NJ, Lewis MA, Rogers MJC, Cui R, Kachar B, Pass JC, Steel KP:  
526 Alternative Splice Forms Influence Functions of Whirlin in Mechanosensory Hair Cell  
527 Stereocilia. *Cell Rep* 2016, 15:935-943.
- 528 54. Wayne S, Robertson NG, DeClau F, Chen N, Verhoeven K, Prasad S, Tranebjerg L, Morton CC,  
529 Ryan AF, Van Camp G, Smith RJ: Mutations in the transcriptional activator EYA4 cause late-  
530 onset deafness at the DFNA10 locus. *Hum Mol Genet* 2001, 10:195-200.
- 531 55. Wang Y, Liu Y, Nie H, Ma X, Xu Z: Alternative splicing of inner-ear-expressed genes. *Front*  
532 *Med* 2016, 10:250-257.
- 533 56. Lagziel A, Overlack N, Bernstein SL, Morell RJ, Wolfrum U, Friedman TB: Expression of  
534 cadherin 23 isoforms is not conserved: implications for a mouse model of Usher syndrome type  
535 1D. *Mol Vis* 2009, 15:1843-1857.
- 536 57. Riazuddin S, Belyantseva IA, Giese AP, Lee K, Indzhukulian AA, Nandamuri SP, Yousaf R,  
537 Sinha GP, Lee S, Terrell D, Hegde RS, Ali RA, Anwar S, Andrade-Elizondo PB, Sirmaci A,  
538 Parise LV, Basit S, Wali A, Ayub M, Ansar M, Ahmad W, Khan SN, Akram J, Tekin M,  
539 Riazuddin S, Cook T, Buschbeck EK, Frolenkov GI, Leal SM, Friedman TB, Ahmed ZM:  
540 Alterations of the CIB2 calcium- and integrin-binding protein cause Usher syndrome type 1J and  
541 nonsyndromic deafness DFNB48. *Nat Genet* 2012, 44:1265-1271.
- 542 58. Wilcox ER, Burton QL, Naz S, Riazuddin S, Smith TN, Ploplis B, Belyantseva I, Ben-Yosef T,  
543 Liburd NA, Morell RJ, Kachar B, Wu DK, Griffith AJ, Riazuddin S, Friedman TB: Mutations in

- 544 the gene encoding tight junction claudin-14 cause autosomal recessive deafness DFNB29. Cell  
545 2001, 104:165-172.
- 546 59. Adato A, Vreugde S, Joensuu T, Avidan N, Hamalainen R, Belenkiy O, Olender T, Bonne-Tamir  
547 B, Ben-Asher E, Espinos C, Millan JM, Lehesjoki AE, Flannery JG, Avraham KB, Pietrokovski  
548 S, Sankila EM, Beckmann JS, Lancet D: USH3A transcripts encode clarin-1, a four-  
549 transmembrane-domain protein with a possible role in sensory synapses. Eur J Hum Genet 2002,  
550 10:339-350.
- 551 60. Vastinsalo H, Jalkanen R, Dinculescu A, Isosomppi J, Geller S, Flannery JG, Hauswirth WW,  
552 Sankila EM: Alternative splice variants of the USH3A gene Clarin 1 (CLRN1). Eur J Hum Genet  
553 2011, 19:30-35.
- 554 61. Lynch ED, Lee MK, Morrow JE, Welsh PL, Leon PE, King MC: Nonsyndromic deafness  
555 DFNA1 associated with mutation of a human homolog of the Drosophila gene diaphanous.  
556 Science 1997, 278:1315-1318.
- 557 62. Sanchez-Mejias A, Fernandez RM, Lopez-Alonso M, Antinolo G, Borrego S: New roles of  
558 EDNRB and EDN3 in the pathogenesis of Hirschsprung disease. Genet Med 2010, 12:39-43.
- 559 63. Cui L, Wong EH, Cheng G, Firmato de Almeida M, So MT, Sham PC, Cherny SS, Tam PK,  
560 Garcia-Barcelo MM: Genetic Analyses of a Three Generation Family Segregating Hirschsprung  
561 Disease and Iris Heterochromia. PLoS One 2013, 8:e66631.
- 562 64. Grillet N, Schwander M, Hildebrand MS, Sczaniecka A, Kolatkar A, Velasco J, Webster JA,  
563 Kahrizi K, Najmabadi H, Kimberling WJ, Stephan D, Bahlo M, Wiltshire T, Tarantino LM, Kuhn  
564 P, Smith RJ, Muller U: Mutations in LOXHD1, an evolutionarily conserved stereociliary protein,  
565 disrupt hair cell function in mice and cause progressive hearing loss in humans. Am J Hum Genet  
566 2009, 85:328-337.
- 567 65. Ahmed ZM, Masmoudi S, Kalay E, Belyantseva IA, Mosrati MA, Collin RW, Riazuddin S,  
568 Hmani-Aifa M, Venselaar H, Kawar MN, Tlili A, van der Zwaag B, Khan SY, Ayadi L,  
569 Riazuddin SA, Morell RJ, Griffith AJ, Charfedine I, Caylan R, Oostrik J, Karaguzel A, Ghorbel



- 570 A, Riazuddin S, Friedman TB, Ayadi H, Kremer H: Mutations of LRTOMT, a fusion gene with  
571 alternative reading frames, cause nonsyndromic deafness in humans. *Nat Genet* 2008, 40:1335-  
572 1340.
- 573 66. Hershey CL, Fisher DE: Genomic analysis of the Microphthalmia locus and identification of the  
574 MITF-J/Mitf-J isoform. *Gene* 2005, 347:73-82.
- 575 67. Chen L, Guo W, Ren L, Yang M, Zhao Y, Guo Z, Yi H, Li M, Hu Y, Long X, Sun B, Li J, Zhai  
576 S, Zhang T, Tian S, Meng Q, Yu N, Zhu D, Tang G, Tang Q, Ren L, Liu K, Zhang S, Che T, Yu  
577 Z, Wu N, Jing L, Zhang R, Cong T, Chen S, Zhao Y, Zhang Y, Bai X, Guo Y, Zhao L, Zhang F,  
578 Zhao H, Zhang L, Hou Z, Zhao J, Li J, Zhang L, Sun W, Zou X, Wang T, Ge L, Liu Z, Hu X,  
579 Wang J, Yang S, Li N: A de novo silencer causes elimination of MITF-M expression and  
580 profound hearing loss in pigs. *BMC Biol* 2016, 14:52.
- 581 68. Ahmed ZM, Yousaf R, Lee BC, Khan SN, Lee S, Lee K, Husnain T, Rehman AU, Bonneux S,  
582 Ansar M, Ahmad W, Leal SM, Gladyshev VN, Belyantseva IA, Van Camp G, Riazuddin S,  
583 Friedman TB, Riazuddin S: Functional null mutations of MSRB3 encoding methionine sulfoxide  
584 reductase are associated with human deafness DFNB74. *Am J Hum Genet* 2011, 88:19-29.
- 585 69. Kelley PM, Weston MD, Chen ZY, Orten DJ, Hasson T, Overbeck LD, Pinnt J, Talmadge CB,  
586 Ing P, Mooseker MS, Corey D, Sumegi J, Kimberling WJ: The genomic structure of the gene  
587 defective in Usher syndrome type Ib (MYO7A). *Genomics* 1997, 40:73-79.
- 588 70. Haraksingh RR, Jahanbani F, Rodriguez-Paris J, Gelernter J, Nadeau KC, Oghalai JS, Schrijver I,  
589 Snyder MP: Exome sequencing and genome-wide copy number variant mapping reveal novel  
590 associations with sensorineural hereditary hearing loss. *BMC Genomics* 2014, 15:1155.
- 591 71. Zwaenepoel I, Mustapha M, Leibovici M, Verpy E, Goodyear R, Liu XZ, Nouaille S, Nance WE,  
592 Kanaan M, Avraham KB, Tekaiia F, Loiselet J, Lathrop M, Richardson G, Petit C: Otoancorin, an  
593 inner ear protein restricted to the interface between the apical surface of sensory epithelia and  
594 their overlying acellular gels, is defective in autosomal recessive deafness DFNB22. *Proc Natl*  
595 *Acad Sci U S A* 2002, 99:6240-6245.

- 596 72. Choi BY, Ahmed ZM, Riazuddin S, Bhinder MA, Shahzad M, Husnain T, Riazuddin S, Griffith  
597 AJ, Friedman TB: Identities and frequencies of mutations of the otoferlin gene (OTOF) causing  
598 DFNB9 deafness in Pakistan. *Clin Genet* 2009, 75:237-243.
- 599 73. Cohen-Salmon M, El-Amraoui A, Leibovici M, Petit C: Otogelin: a glycoprotein specific to the  
600 acellular membranes of the inner ear. *Proc Natl Acad Sci U S A* 1997, 94:14450-14455.
- 601 74. Schraders M, Ruiz-Palmero L, Kalay E, Oostrik J, del Castillo FJ, Sezgin O, Beynon AJ, Strom  
602 TM, Pennings RJ, Zazo Seco C, Oonk AM, Kunst HP, Dominguez-Ruiz M, Garcia-Arumi AM,  
603 del Campo M, Villamar M, Hoefsloot LH, Moreno F, Admiraal RJ, del Castillo I, Kremer H:  
604 Mutations of the gene encoding otogelin are a cause of autosomal-recessive nonsyndromic  
605 moderate hearing impairment. *Am J Hum Genet* 2012, 91:883-889.
- 606 75. Housley GD, Kanjhan R, Raybould NP, Greenwood D, Salih SG, Jarlebark L, Burton LD, Setz  
607 VC, Cannell MB, Soeller C, Christie DL, Usami S, Matsubara A, Yoshie H, Ryan AF, Thorne  
608 PR: Expression of the P2X(2) receptor subunit of the ATP-gated ion channel in the cochlea:  
609 implications for sound transduction and auditory neurotransmission. *J Neurosci* 1999, 19:8377-  
610 8388.
- 611 76. Lynch KJ, Touma E, Niforatos W, Kage KL, Burgard EC, van Biesen T, Kowaluk EA, Jarvis  
612 MF: Molecular and functional characterization of human P2X(2) receptors. *Mol Pharmacol* 1999,  
613 56:1171-1181.
- 614 77. Monsoro-Burq AH: PAX transcription factors in neural crest development. *Semin Cell Dev Biol*  
615 2015, 44:87-96.
- 616 78. Alagramam KN, Miller ND, Adappa ND, Pitts DR, Heaphy JC, Yuan H, Smith RJ: Promoter,  
617 alternative splice forms, and genomic structure of protocadherin 15. *Genomics* 2007, 90:482-492.
- 618 79. Alagramam KN, Yuan H, Kuehn MH, Murcia CL, Wayne S, Srisailpathy CR, Lowry RB, Knaus  
619 R, Van Laer L, Bernier FP, Schwartz S, Lee C, Morton CC, Mullins RF, Ramesh A, Van Camp  
620 G, Hageman GS, Woychik RP, Smith RJ: Mutations in the novel protocadherin PCDH15 cause  
621 Usher syndrome type 1F. *Hum Mol Genet* 2001, 10:1709-1718.

- 622 80. Ahmed ZM, Riazuddin S, Ahmad J, Bernstein SL, Guo Y, Sabar MF, Sieving P, Riazuddin S,  
623 Griffith AJ, Friedman TB, Belyantseva IA, Wilcox ER: PCDH15 is expressed in the  
624 neurosensory epithelium of the eye and ear and mutant alleles are responsible for both USH1F  
625 and DFNB23. *Hum Mol Genet* 2003, 12:3215-3223.
- 626 81. Khan SY, Ahmed ZM, Shabbir MI, Kitajiri S, Kalsoom S, Tasneem S, Shayiq S, Ramesh A,  
627 Srisailpathy S, Khan SN, Smith RJ, Riazuddin S, Friedman TB, Riazuddin S: Mutations of the  
628 RDX gene cause nonsyndromic hearing loss at the DFNB24 locus. *Hum Mutat* 2007, 28:417-423.
- 629 82. Jin H, May M, Tranebjaerg L, Kendall E, Fontan G, Jackson J, Subramony SH, Arena F, Lubs H,  
630 Smith S, Stevenson R, Schwartz C, Vetrie D: A novel X-linked gene, DDP, shows mutations in  
631 families with deafness (DFN-1), dystonia, mental deficiency and blindness. *Nat Genet* 1996,  
632 14:177-180.
- 633 83. Nakane T, Inada Y, Ito F, Itoh N, Tazawa S, Chiba S: Cloning and expression of mouse deafness  
634 dystonia peptide 1 cDNA. *Biochem Biophys Res Commun* 2000, 273:759-764.
- 635 84. Scott HS, Kudoh J, Wattenhofer M, Shibuya K, Berry A, Chrast R, Guipponi M, Wang J,  
636 Kawasaki K, Asakawa S, Minoshima S, Younus F, Mehdi SQ, Radhakrishna U, Papasavvas MP,  
637 Gehrig C, Rossier C, Korostishevsky M, Gal A, Shimizu N, Bonne-Tamir B, Antonarakis SE:  
638 Insertion of beta-satellite repeats identifies a transmembrane protease causing both congenital and  
639 childhood onset autosomal recessive deafness. *Nat Genet* 2001, 27:59-63.
- 640 85. Verpy E, Leibovici M, Zwaenepoel I, Liu XZ, Gal A, Salem N, Mansour A, Blanchard S,  
641 Kobayashi I, Keats BJ, Slim R, Petit C: A defect in harmonin, a PDZ domain-containing protein  
642 expressed in the inner ear sensory hair cells, underlies Usher syndrome type 1C. *Nat Genet* 2000,  
643 26:51-55.
- 644 86. Khateb S, Zelinger L, Ben-Yosef T, Merin S, Crystal-Shalit O, Gross M, Banin E, Sharon D:  
645 Exome sequencing identifies a founder frameshift mutation in an alternative exon of USH1C as  
646 the cause of autosomal recessive retinitis pigmentosa with late-onset hearing loss. *PLoS One*  
647 2012, 7:e51566.

- 648 87. Bahloul A, Michel V, Hardelin JP, Nouaille S, Hoos S, Houdusse A, England P, Petit C:  
649 Cadherin-23, myosin VIIa and harmonin, encoded by Usher syndrome type I genes, form a  
650 ternary complex and interact with membrane phospholipids. *Hum Mol Genet* 2010, 19:3557-  
651 3565.
- 652 88. Santos-Cortez RL, Lee K, Giese AP, Ansar M, Amin-Ud-Din M, Rehn K, Wang X, Aziz A, Chiu  
653 I, Hussain Ali R, Smith JD, University of Washington Center for Mendelian G, Shendure J,  
654 Bamshad M, Nickerson DA, Ahmed ZM, Ahmad W, Riazuddin S, Leal SM: Adenylate cyclase 1  
655 (ADCY1) mutations cause recessive hearing impairment in humans and defects in hair cell  
656 function and hearing in zebrafish. *Hum Mol Genet* 2014, 23:3289-3298.
- 657 89. Nyegaard M, Rendtorff ND, Nielsen MS, Corydon TJ, Demontis D, Starnawska A, Hedemand A,  
658 Buniello A, Niola F, Overgaard MT, Leal SM, Ahmad W, Wikman FP, Petersen KB, Cruger DG,  
659 Oostrik J, Kremer H, Tommerup N, Frodin M, Steel KP, Tranebjaerg L, Borglum AD: A Novel  
660 Locus Harboring a Functional CD164 Nonsense Mutation Identified in a Large Danish Family  
661 with Nonsyndromic Hearing Impairment. *PLoS Genet* 2015, 11:e1005386.
- 662 90. Gagnon LH, Longo-Guess CM, Berryman M, Shin JB, Saylor KW, Yu H, Gillespie PG, Johnson  
663 KR: The chloride intracellular channel protein CLIC5 is expressed at high levels in hair cell  
664 stereocilia and is essential for normal inner ear function. *J Neurosci* 2006, 26:10188-10198.
- 665 91. Diaz-Horta O, Subasioglu-Uzak A, Grati M, DeSmidt A, Foster J, 2nd, Cao L, Bademci G,  
666 Tokgoz-Yilmaz S, Duman D, Cengiz FB, Abad C, Mittal R, Blanton S, Liu XZ, Farooq A, Walz  
667 K, Lu Z, Tekin M: FAM65B is a membrane-associated protein of hair cell stereocilia required for  
668 hearing. *Proc Natl Acad Sci U S A* 2014, 111:9864-9868.
- 669 92. Zhao B, Wu Z, Muller U: Murine Fam65b forms ring-like structures at the base of stereocilia  
670 critical for mechanosensory hair cell function. *Elife* 2016, 5.
- 671 93. Thoenes M, Zimmermann U, Ebermann I, Ptok M, Lewis MA, Thiele H, Morlot S, Hess MM,  
672 Gal A, Eisenberger T, Bergmann C, Nurnberg G, Nurnberg P, Steel KP, Knipper M, Bolz HJ:

- 673 OSBPL2 encodes a protein of inner and outer hair cell stereocilia and is mutated in autosomal  
674 dominant hearing loss (DFNA67). *Orphanet J Rare Dis* 2015, 10:15.
- 675 94. Grati M, Shin JB, Weston MD, Green J, Bhat MA, Gillespie PG, Kachar B: Localization of  
676 PDZD7 to the stereocilia ankle-link associates this scaffolding protein with the Usher syndrome  
677 protein network. *J Neurosci* 2012, 32:14288-14293.
- 678 95. Schneider E, Marker T, Daser A, Frey-Mahn G, Beyer V, Farcas R, Schneider-Ratzke B,  
679 Kohlschmidt N, Grossmann B, Bauss K, Napiontek U, Keilmann A, Bartsch O, Zechner U,  
680 Wolfrum U, Haaf T: Homozygous disruption of PDZD7 by reciprocal translocation in a  
681 consanguineous family: a new member of the Usher syndrome protein interactome causing  
682 congenital hearing impairment. *Hum Mol Genet* 2009, 18:655-666.
- 683 96. Baig SM, Koschak A, Lieb A, Gebhart M, Dafinger C, Nurnberg G, Ali A, Ahmad I, Sinnegger-  
684 Brauns MJ, Brandt N, Engel J, Mangoni ME, Farooq M, Khan HU, Nurnberg P, Striessnig J,  
685 Bolz HJ: Loss of Ca(v)1.3 (CACNA1D) function in a human channelopathy with bradycardia and  
686 congenital deafness. *Nat Neurosci* 2011, 14:77-84.
- 687 97. Schultz JM, Khan SN, Ahmed ZM, Riazuddin S, Waryah AM, Chhatre D, Starost MF, Ploplis B,  
688 Buckley S, Velasquez D, Kabra M, Lee K, Hassan MJ, Ali G, Ansar M, Ghosh M, Wilcox ER,  
689 Ahmad W, Merlino G, Leal SM, Riazuddin S, Friedman TB, Morell RJ: Noncoding mutations of  
690 HGF are associated with nonsyndromic hearing loss, DFNB39. *Am J Hum Genet* 2009, 85:25-39.

691

692

693

694

695

696

697 **Figure Legends:**

698 **Figure 1: A) Transcript Curation Workflow:** 109 hearing loss-associated genes,  
699 predominantly from the OtoGenome™ Test (GTR000509148.7), were categorized. Genes were  
700 divided into 3 categories using NCBI reference sequence (RefSeq) transcripts. Category 1 (C1)  
701 contained genes that had a single transcript, genes in category 2 (C2) had multiple transcripts,  
702 but the longest transcript encompassed all exons, and Category 3 (C3) genes had multiple  
703 transcripts with unique exons. **B) Category 2 and 3 Curation Process:** Category 2 and 3 genes  
704 were manually curated. Exon-specific expression data was pulled from GTEx and gEAR.  
705 Literature searches were performed for information about functional domains, additional  
706 expression data, such as tissue-specific transcript expression, and temporal expression. To  
707 evaluate population variation, loss of function variants were pulled from gnomAD. To evaluate  
708 interpreted variation, LP/P variants were pulled from our internal database (also in ClinVar) and  
709 ClinVar and DM variants were pulled from HGMD. **C) Exon Curation Process:** Exons were  
710 categorized as “Clinically relevant,” “Uncertain significance,” or “Clinically Insignificant” based  
711 on the pieces of evidence listed in the table.

712 **Figure 2: A) Gene, exon, and transcript Counts:** Genes were categorized and transcripts and  
713 exons were counted. **B) Exon Counts Across Categories:** For each of the three categories,  
714 exons were classified as Noncoding, Uncertain, or Insignificant as per the definitions in Figure  
715 1C. **C) Impact on Interpretation:** Variant counts in uncertain and insignificant exons for each  
716 category were collected from HGMD and ClinVar. DM, Disease causing mutation; LP, Likely  
717 Pathogenic; P, Pathogenic; VUS, Variant of Uncertain Significance.

718 **Figure 3: Visualization of category 2 example, *EDN3*.** A) Transcript view of the *EDN3* gene.  
719 The high frequency loss of function variant is pulled from gnomAD and is located in the exon  
720 boxed in red.

721 **Figure 4: Visualization of category 3 example, *PAX3*.** A) Transcript view of the *PAX3* gene.  
722 B) A close-up of the high frequency nonsense variant in exon 4d. C) A close-up of the two  
723 uncertain exons in *PAX3*, and 9a (NM\_181459.3) and 8c (NM\_181460.3).

724 **Figure 5. Visualization of three genes with known technically challenging regions.** Exons in  
725 Otoancorin, *OTOA* (*top*) or Stereoclin, *STRC* (*bottom*) with high homology to other genomic  
726 sequences; and GC-rich first exon in the potassium channel, *KCNQ1* (*middle*). MQ and coverage  
727 plots are displayed for *OTOA*, *KCNQ1* and *STRC*. Green bars indicate exons with both average  
728  $MQ \geq 20$  and  $\min DP \geq 15$ . Orange bar represents either average  $MQ < 20$  or  $\min DP < 15$ . Red  
729 bars indicate poor exons where both average  $MQ < 20$  and  $\min DP < 15$ . Each bar in MQ and  
730 coverage plots shows minimum and maximum range for each exon (top and bottom of the bar),  
731 average is shown by a tick mark in the middle of each bar.

732

733 **Table 1: Curated transcripts for category 2 and 3 genes.** The minimal curated transcript set  
 734 with all unique exons for categories 2 and 3 are listed. C2 genes in which the curated transcript is  
 735 not the longest one are listed in bold.

| Gene                  | Category | Transcript Set        |
|-----------------------|----------|-----------------------|
| <i>ACTG1</i>          | 2        | NM_001199954.1†       |
| <i>BCS1L</i>          | 2        | NM_004328.4†          |
| <i>CATSPER2</i>       | 2        | NM_001282310.1†       |
| <i>CCDC50</i>         | 2        | NM_178335.2†          |
| <i>CEP78</i>          | 2        | NM_001098802.1†       |
| <i>CHD7</i>           | 2        | NM_017780.3†          |
| <i>COCH</i>           | 2        | NM_001347720.1†       |
| <i>COL11A2</i>        | 2        | NM_080680.2†          |
| <i>COL4A5</i>         | 2        | NM_033380.2†          |
| <i>DFNA5</i>          | 2        | NM_004403.2†          |
| <i>DFNB59 (PJKV)</i>  | 2        | NM_001042702.3†       |
| <i>DIABLO</i>         | 2        | NM_019887.5†          |
| <i>EDN3</i>           | 2        | NM_207034.2†          |
| <i>GJB6</i>           | 2        | NM_001110219.2†       |
| <b><i>GPSM2</i></b>   | <b>2</b> | <b>NM_013296.4</b>    |
| <i>HARS</i>           | 2        | NM_002109.5†          |
| <i>HARS2</i>          | 2        | NM_012208.2†          |
| <i>ILDRI</i>          | 2        | NM_001199799.1†       |
| <i>KARS</i>           | 2        | NM_001130089.1†       |
| <i>KCNE1</i>          | 2        | NM_000219.5†          |
| <i>KCNQ4</i>          | 2        | NM_004700.3†          |
| <i>KITLG</i>          | 2        | NM_000899.4†          |
| <i>MARVELD2</i>       | 2        | NM_001038603.2†       |
| <i>MYH14</i>          | 2        | NM_001145809.1†       |
| <b><i>MYO6</i></b>    | <b>2</b> | <b>NM_001300899.1</b> |
| <i>NLRP3</i>          | 2        | NM_004895.4†          |
| <i>PRPS1</i>          | 2        | NM_002764.3†          |
| <i>SLC52A2</i>        | 2        | NM_024531.4†          |
| <i>SYNE4</i>          | 2        | NM_001039876.2        |
| <b><i>TBC1D24</i></b> | <b>2</b> | <b>NM_020705.2</b>    |
| <i>USH1G</i>          | 2        | NM_173477.4†          |
| <i>USH2A</i>          | 2        | NM_206933.2†          |
|                       | 2        | NM_007123.5           |



|                      |   |                  |
|----------------------|---|------------------|
| <i>WFS1</i>          | 2 | NM_006005.3†     |
| <i>ADCY1</i>         | 3 | NM_021116.2*†    |
|                      | 3 | NM_001281768.1   |
| <i>CABP2</i>         | 3 | NM_016366.2*     |
|                      | 3 | NM_001318496.1†  |
| <i>CACNA1D</i>       | 3 | NM_000720.3*†    |
|                      | 3 | NM_001128839.2   |
| <i>CDC14A</i>        | 3 | NM_033312.2*†    |
|                      | 3 | NM_003672.3      |
|                      | 3 | NM_033313.2      |
|                      | 3 | NM_001319210.1   |
| <i>CDH23</i>         | 3 | NM_022124.5*†    |
|                      | 3 | NM_001171935.1   |
|                      | 3 | NM_001171932.1   |
|                      | 3 | NM_052836.3      |
|                      | 3 | NM_001171931.1   |
|                      | 3 | NM_001171930.1   |
|                      | 3 | NM_001171936.1   |
| <i>CD164</i>         | 3 | NM_006016.5*†    |
|                      | 3 | NM_001142404.2   |
| <i>CIB2</i>          | 3 | NM_006383*†      |
|                      | 3 | NM_001301224     |
| <i>CLIC5</i>         | 3 | NM_001114086.1*† |
|                      | 3 | NM_016929.4      |
|                      | 3 | NM_001256023.1   |
| <i>CLDN14</i>        | 3 | NM_144492*†      |
| <i>CLRN1</i>         | 3 | NM_174878.2*     |
|                      | 3 | NM_052995.2      |
|                      | 3 | NM_001195794.1†  |
|                      | 3 | NM_001256819.1   |
| <i>DFNB31 (WHRN)</i> | 3 | NM_015404.3*†    |
|                      | 3 | NM_001346890.1   |
| <i>DIAPH1</i>        | 3 | NM_005219.4*†    |
|                      | 3 | NM_001314007.1   |
| <i>EDNRB</i>         | 3 | NM_000115.4*†    |
|                      | 3 | NM_001201397.1   |
|                      | 3 | NM_003991.3      |
| <i>EYA1</i>          | 3 | NM_000503.5*†    |
|                      | 3 | NM_172060.3      |

|                |   |                  |
|----------------|---|------------------|
| <i>EYA4</i>    | 3 | NM_004100.4*     |
|                | 3 | NM_172105.3      |
|                | 3 | NM_001301013.1†  |
| <i>HGF</i>     | 3 | NM_000601.5*†    |
|                | 3 | NM_001010931.2   |
|                | 3 | NM_001010934.2   |
| <i>HSD17B4</i> | 3 | NM_001199291.1*† |
|                | 3 | NM_000414.3      |
|                | 3 | NM_0012929027.1  |
|                | 3 | NM_001292028.1   |
| <i>KCNQ1</i>   | 3 | NM_000218.2*†    |
|                | 3 | NM_181798.1      |
| <i>LOXHD1</i>  | 3 | NM_144612.6*†    |
|                | 3 | NM_001145472.2   |
| <i>LRTOMT</i>  | 3 | NM_00145309.5*†  |
|                | 3 | NM_001205138.3   |
|                | 3 | NM_001145307.4   |
| <i>MITF</i>    | 3 | NM_000248.3*     |
|                | 3 | NM_198159.2†     |
| <i>MSRB3</i>   | 3 | NM_001193460.1*  |
|                | 3 | NM_198080.3†     |
| <i>MYO7A</i>   | 3 | NM_000260.3*†    |
|                | 3 | NM_001127179.2   |
| <i>OSBPL2</i>  | 3 | NM_144498.2*†    |
|                | 3 | NM_001278649.1   |
| <i>OTOA</i>    | 3 | NM_144672.3*†    |
|                | 3 | NM_001161683.1   |
|                | 3 | NM_170664.2      |
| <i>OTOF</i>    | 3 | NM_001287489.1*  |
|                | 3 | NM_194248.2†     |
|                | 3 | NM_194322.2      |
| <i>OTOG</i>    | 3 | NM_001277269.1*† |
|                | 3 | NM_001292063.1   |
| <i>PAX3</i>    | 3 | NM_001127366.2*  |
|                | 3 | NM_181459.3†     |
|                | 3 | NM_181457.3      |
|                | 3 | NM_181461.3      |
|                | 3 | NM_000438.5      |
|                | 3 | NM_013942.4      |

|                 |   |                  |
|-----------------|---|------------------|
| <i>PCDH15</i>   | 3 | NM_001142763.1*† |
|                 | 3 | NM_001142769.1   |
|                 | 3 | NM_001142771.1   |
|                 | 3 | NM_001354430.1   |
|                 | 3 | NM_001142770.1   |
| <i>PDZD7</i>    | 3 | NM_001195263.1*† |
|                 | 3 | NM_001351044.1   |
|                 | 3 | NM_024895.4      |
| <i>P2RX2</i>    | 3 | NM_174873.1*     |
|                 | 3 | NM_170683.2†     |
|                 | 3 | NM_001282164.1   |
|                 | 3 | NM_001282165.1   |
| <i>RIPOR2</i>   | 3 | NM_014722.3*†    |
|                 | 3 | NM_001286445.1   |
|                 | 3 | NM_001286446.1   |
|                 | 3 | NM_015864.3      |
| <i>RDX</i>      | 3 | NM_002906.3*†    |
|                 | 3 | NM_001260494.1   |
| <i>SERPINB6</i> | 3 | NM_004568.5*     |
|                 | 3 | NM_001271822.1   |
|                 | 3 | NM_001271823.1   |
| <i>TIMM8A</i>   | 3 | NM_004085.3*†    |
|                 | 3 | NM_001145951.1   |
| <i>TMPRSS3</i>  | 3 | NM_024022.2*†    |
|                 | 3 | NM_032405.1      |
| <i>TRIOBP</i>   | 3 | NM_001039141.2*† |
|                 | 3 | NM_138632.2      |
| <i>USH1C</i>    | 3 | NM_153676.3*†    |
|                 | 3 | NM_001297764.1   |

736 \*Primary transcript, †Longest transcript

737

**FIGURE 1****A.**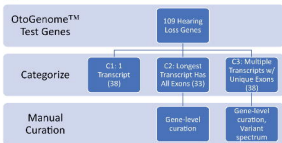**B.**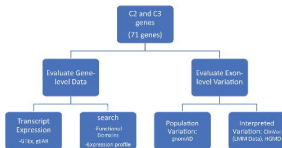**C.**

| Exon Designation<br>(n genes with a clinical validity of at least Moderate) | Evidence Used for Designation                                                                                                                                                                                            |
|-----------------------------------------------------------------------------|--------------------------------------------------------------------------------------------------------------------------------------------------------------------------------------------------------------------------|
| Clinically Significant Exon                                                 | <ul style="list-style-type: none"> <li>evidence that exon is required for biological function (e.g. pathogenic variants)</li> <li>AND/OR</li> <li>No alternative splicing</li> </ul>                                     |
| Exon of Uncertain Significance                                              | <ul style="list-style-type: none"> <li>No expression data in the literature</li> <li>AND</li> <li>Alternative splicing</li> <li>AND/OR</li> <li>1 high frequency LoF variant in gnomAD (&gt;0.3%)</li> </ul>             |
| Clinically Insignificant Exon                                               | <ul style="list-style-type: none"> <li>Literature confirms exon is not expressed in tissue of clinical relevance</li> <li>AND/OR</li> <li>&gt;1 high quality, high frequency LoF variant in gnomAD (&gt;0.3%)</li> </ul> |

# FIGURE 2

## A.

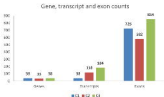

## B.

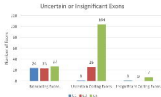

## C.

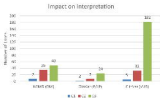

FIGURE 3

**EDN3**

NM\_207084.2

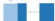

NM\_001302455.1

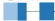

NM\_001302456.1

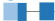

NM\_207032.2

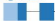

NM\_207033.2

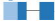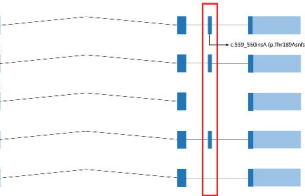



● Average MQ  $\geq 20$  AND minimum DP  $\geq 15$ 
● Average MQ  $< 20$  OR minimum DP  $< 15$ 
● Average MQ  $< 20$  AND min DP  $< 15$

### OTOA

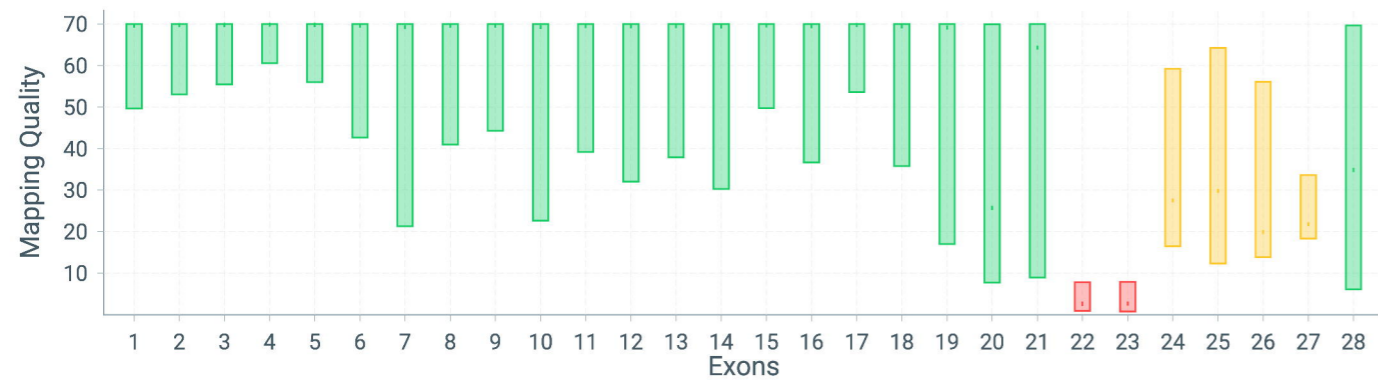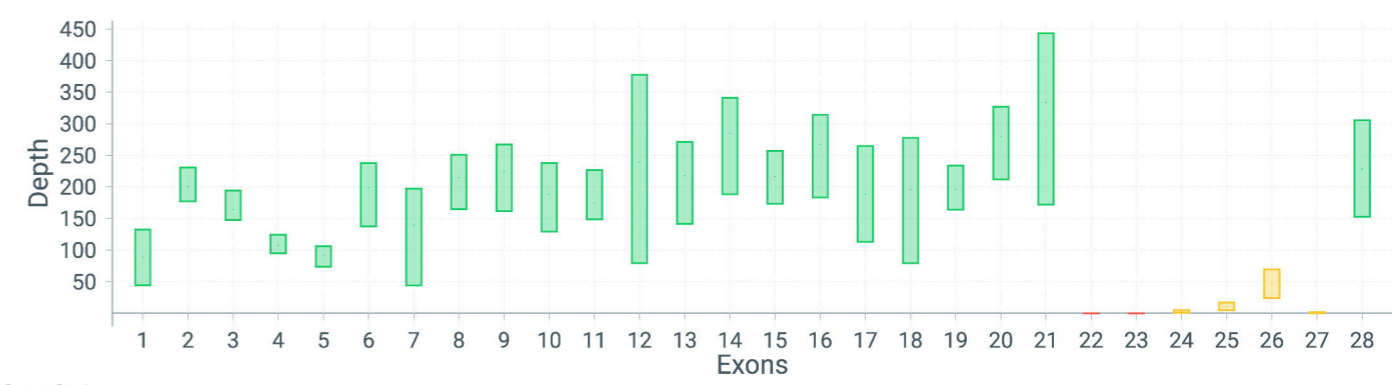

### KCNQ1

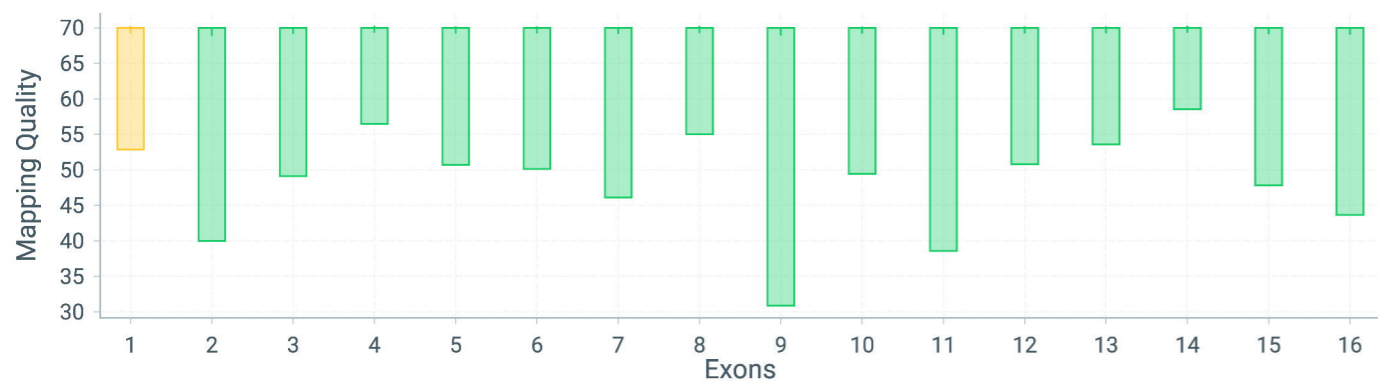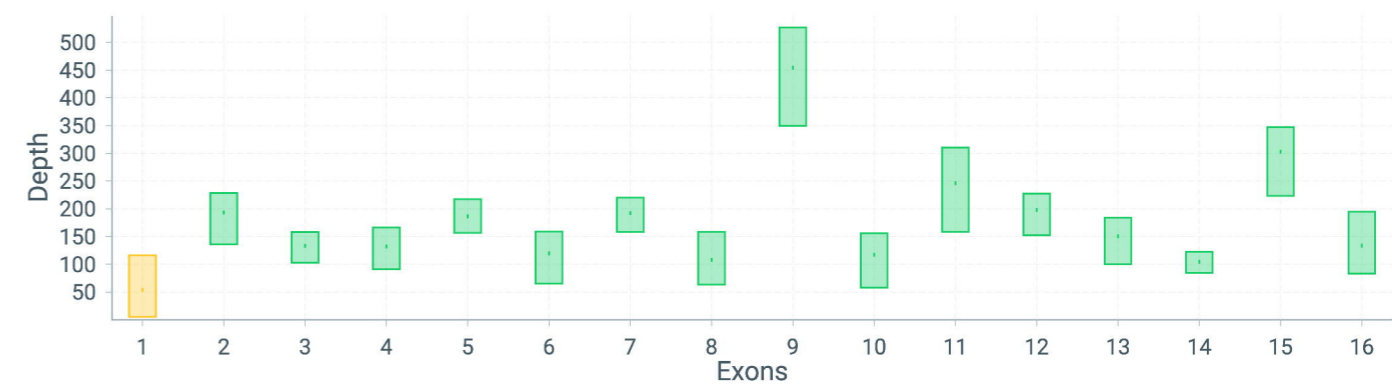

### STRC

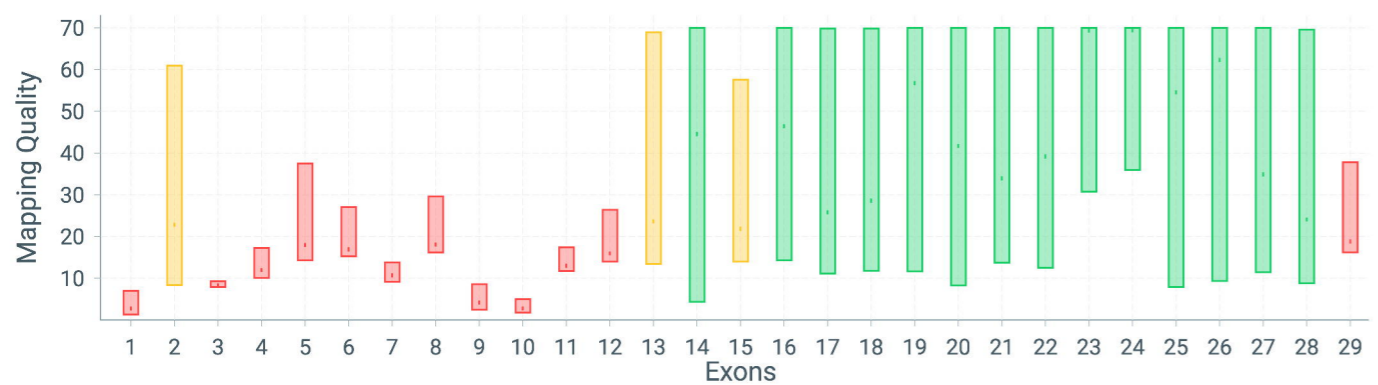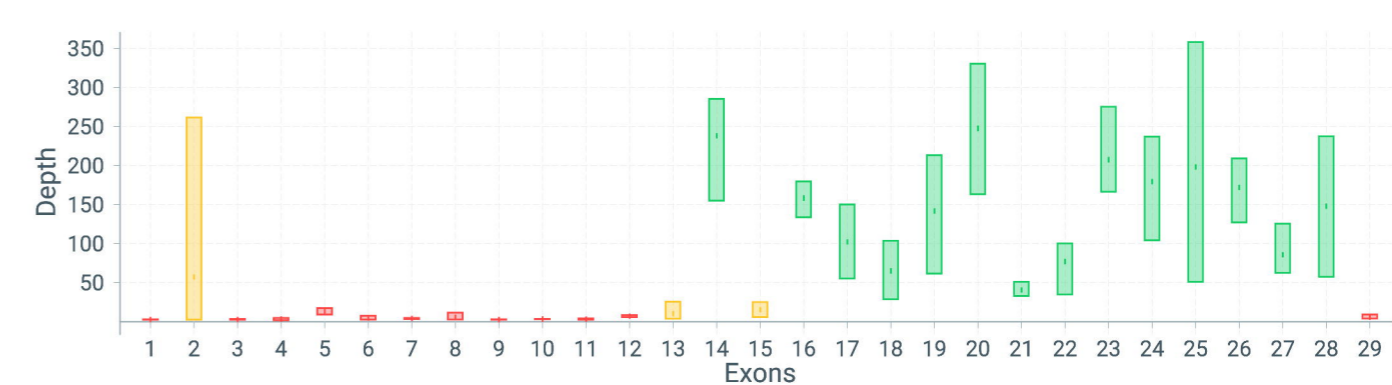

Source: https://www.biorxiv.org/content/10.1101/276287v1.full.pdf
